# Supplementary material
Source: MDPI journal article supplement (https://www.mdpi.com/1424-2818/15/8/930)
Supplement: s1 [file s1]

Archive with 5 entries (5 files):
- Figure S1.pdf
- Table S1.xlsx
- Table S2.xlsx
- Table S3.xlsx
- Table S4.xlsx
