# Supplementary material
Source: MDPI journal article supplement (https://www.mdpi.com/1424-2818/15/8/930)
Supplement: s1 [file s1 › Table S1.xlsx]

## Sheet: Table 1
Table 1. Sampling location details
№	Location	Year(s)	Coordinates	Locust species	notes
1	Rostov region, Bagayevsky district	2019	47.249485N 40.264780 E	Locusta migratoria, Calliptamus italicus	area between forb–wormwood steppe and reedbeds
2	Rostov region, Salsky district, near Sryedniy Yegorlyk river	2020, 2021	46.417576N 41.309966E	Calliptamus italicus+single specimens of Dociostaurus sp.(in 2021)	forb–wormwood steppe, ~50 ha, collected 09.07.2020, 19.06.2021
3	Krasnodar region, Starominsky district	2020	46.612594N 39.221164E	Locusta migratoria	reedbeds, ~40 ha, collected 02.07.2020
4	Krasnodar region, Primorsko-Akhtarsky district	2020	45.762667N 38.526972E		reedbeds, ~50 ha, collected 20-30.10.2020
5	Krasnodar region, the border of Kalininsky and Primorsko-Akhtarsky districts	2020	45.726264N 38.412625E		reedbeds, ~10 ha (more than ~10000 га), collected 23-26.06.2020
6	Krasnodar region, Primorsko-Akhtarsky district	2021	45.7331991N 38.3970525E		reedbeds, ~50 ha, collected 30.10.2021
7	Republic of Kalmykia, Iki-Burulsky district	2021	45.70595N 44.15832E	Dociostaurus maroccanus	gramineous-forb steppe, ~10 га, collected 11.06.2021
8	Republic of Kalmykia, Tselinny district	2021	46.29714N 44.434679E		gramineous-forb steppe, ~10 ha, collected 11.06.2021
9	Republic of Kalmykia, Chernozemelsky district	2021	45.868507N 45.825854E		gramineous-forb steppe, ~100 ha, collected 12.06.2021
10	Stavropol region, Levokumsky district	2020	44.849301N 44.658841E	complex: Calliptamus sp. (88,5%), Dociostaurus sp. (5,1%), other (6,4%)	gramineous-forb steppe, ~10 ha, collected 04.07.2020
11	Republic of Dagestan, Nogaysky district	2021	44.591214N 45.613831E	Dociostaurus maroccanus	forb steppe, ~10 ha, collected 13.06.2021
12	Republic of Dagestan, Tarumovsky district	2020	44.418219N 46.567963E	complex: Calliptamus sp. (14,6%), Dociostaurus sp. (56,4%), other (29,0%)	forb steppe, ~10 ha, collected 05.07.2020
13	Republic of Dagestan, Kizlyarsky district	2020	44.135999N 46.992157E	Locusta migratoria	reedbeds around rice checks ~5 ha, collected 05.07.2020
14	Republic of Dagestan, Kizlyarsky district	2020	44.116529N 47.150577E	complex: Calliptamus sp. (44,1%), Dociostaurus sp. (42,7%), other (13,2%)	forb–wormwood steppe, ~10 ha, collected 05.07.2020
15	Republic of Dagestan, Kumtorkalinsky district	2021	42.994773N 47.257051E	complex: Dociostaurus sp. (30,82 %), Calliptamus sp. (23,63 %), other (45,55 %)	forb steppe, ~10 ha, collected 14.06.2021
16	Republic of Dagestan, Tabasaransky District	2021	41.855734N 48.295759E	complex: Dociostaurus sp. (44,35 %), Calliptamus sp. (27,42 %), other (28,23 %)	forb steppe, ~50 ha, collected 15.07.2021
17	Astrakhan region, Akhtubinsky District	2021	48.009922N 46.45978E	Calliptamus italicus	forb–wormwood steppe along the road, ~1,5 ha, collected 17.06.2021
18	Astrakhan region, Akhtubinsky District	2020	48.58854N 45.704412E		forb–wormwood steppe along the road, ~200 м, collected 06.07.2020
19	Volgograd region, Svetloyarsky district, near Sarninskoe lake	2020	48.407908N 44.595948E	Locusta migratoria	reedbeds, ~200 ha, collected 08.07.2020
20	Volgograd region, Bykovsky district	2020	49.432136N 45.178634E	Calliptamus italicus	forb–wormwood steppe, collected 07.07.2020
