# Supplementary material
Source: MDPI journal article supplement (https://www.mdpi.com/1424-2818/15/8/930)
Supplement: s1 [file s1 › Table S2.xlsx]

## Sheet: Table 2
Table 2. Infection frequency in different locust populations
№ *	location	coordinates	host	Σ individ.	Mycosis
					infected individuals	% of infection rate	fungi isolated**
2019
1	Rostov region, Bagayevsky district	47.249485N, 40.264780E	L. migratoria	1000	12	1.2	7
			C. italicus	150	9	6.0	7
2020
2	Rostov region, Salsky district, near Sryedniy Yegorlyk river, 09.07.2020	46.417576N, 41.309966E	C. italicus	288	4	1.4	4
3	Krasnodar region, Starominsky district, 02.07.2020	46.612594N, 39.221164E	L. migratoria	386	0	0	0
4	Krasnodar region, Primorsko-Akhtarsky district, 20-30.10.2020	45.762667N, 38.526972E		1070	303	28.3	18
5	Krasnodar region, the border of Kalininsky and Primorsko-Akhtarsky districts, 23-26.06.2020	45.726264N, 38.412625E		312	0	0	0
10	Stavropol region, Levokumsky district, 04.07.2020	44.849301N, 44.658841E	complex	78	0	0	0
12	Republic of Dagestan, Tarumovsky district, 05.07.2020	44.418219N, 46.567963E	complex	55	0	0	0
13	Republic of Dagestan, Kizlyarsky district, 05.07.2020	44.135999N, 46.992157E	L. migratoria	166	0	0	0
14	Republic of Dagestan, Kizlyarsky district, 05.07.2020	44.116529N, 47.150577E	complex	136	0	0	0
18	Astrakhan region, Akhtubinsky District , 06.07.2020	48.58854N, 45.704412E	C. italicus	172	2	1.2	2
19	Volgograd region, Svetloyarsky district, near Sarninskoe lake, 08.07.2020	48.407908N, 44.595948E	L. migratoria	183	2	1.1	2
20	Volgograd region, Bykovsky district, 07.07.2020	49.432136N, 45.178634E	C. italicus	239	0	0	0
2021
2	Rostov region, Salsky district, near Sryedniy Yegorlyk river, 19.06.2021	46.417576N, 41.309966E	C. italicus +Dociostaurus sp.	21	1	4.8	1
6	Krasnodar region, Primorsko-Akhtarsky district, 30.10.2021	45.7331991N, 38.3970525E	L. migratoria	68	15	22.1	2
7	Republic of Kalmykia, Iki-Burulsky district, 11.06.2021	45.70595N, 44.15832E	D. maroccanus	92	3	3.3	-
8	Republic of Kalmykia, Tselinny district, 11.06.2021	46.29714N, 44.434679E		68	0	0	0
9	Republic of Kalmykia, Chernozemelsky district, 12.06.2021	45.868507N, 45.825854E		105	2	1.9	1
11	Republic of Dagestan, Nogaysky district, 13.06.2021	44.591214N, 45.613831 E	D. maroccanus	101	0	0	0
15	Republic of Dagestan, Kumtorkalinsky district, 14.06.2021	42.994773N, 47.257051E	complex	56	1	1.8	1
16	Republic of Dagestan, Tabasaransky District, 15.07.2021	41.855734N, 48.295759E		63	0	0	0
17	Astrakhan region, Akhtubinsky District , 17.06.2021	48.009922N, 46.45978E	C. italicus	77	5	6.5	-
* Number of locations designated according Figure 1 and Table S1
** The number of individuals with mycoses and successfully obtained isolates are not equal due to common problems while isolating and maintaining of pure cultures
