# Supplementary material
Source: MDPI journal article supplement (https://www.mdpi.com/1424-2818/15/8/930)
Supplement: s1 [file s1 › Table S3.xlsx]

## Sheet: Table 3
Table 3. Beauveria spp. isolated in this study, their origin, host, clades and GenBank numbers
№	Isolate	Fungal species	Clade №*		Host	Year	Coordinates	Location №**	Location	Genbank accession number
										tef1-alpha	bloc
1	BCi1Rv19	B. bassiana	1	steppe	C. italicus	2019	47.249485N 40.264780E	1	Rostov region, Bagayevsky district	OQ067541	OP947704
2	BCi2Rv19	B. bassiana	1	steppe	C. italicus	2019	47.249485N 40.264780E	1	Rostov region, Bagayevsky district	OQ067542	OP947705
3	BCi3Rv19	B. bassiana	1	steppe	C. italicus	2019	47.249485N 40.264780E	1	Rostov region, Bagayevsky district	OQ067543	OP947706
4	BCi4Rv19	B. bassiana	1	steppe	C. italicus	2019	47.249485N 40.264780E	1	Rostov region, Bagayevsky district	OQ067544	OP947707
5	BCi5Rv19	B. bassiana	1	steppe	C. italicus	2019	47.249485N 40.264780E	1	Rostov region, Bagayevsky district	OQ067545	OP947708
6	BCi6Rv19	B. bassiana	1	steppe	C. italicus	2019	47.249485N 40.264780E	1	Rostov region, Bagayevsky district	OQ067546	OP947709
7	BCi7Rv19	B. bassiana	2	steppe	C. italicus	2019	47.249485N 40.264780E	1	Rostov region, Bagayevsky district	OQ067547	OP947710
8	BLm1Rv19	B. bassiana	3	reedbeds	L. migratoria	2019	47.249485N 40.264780E	1	Rostov region, Bagayevsky district	OQ067559	OP947722
9	BLm2Rv19	B. bassiana	3	reedbeds	L. migratoria	2019	47.249485N 40.264780E	1	Rostov region, Bagayevsky district	OQ067569	OP947732
10	BLm3Rv19	B. bassiana	1	reedbeds	L. migratoria	2019	47.249485N 40.264780E	1	Rostov region, Bagayevsky district	OQ067572	OP947735
11	BLm4Rv19	B. bassiana	1	reedbeds	L. migratoria	2019	47.249485N 40.264780E	1	Rostov region, Bagayevsky district	OQ067574	OP947737
12	BLm5Rv19	B. bassiana	1	reedbeds	L. migratoria	2019	47.249485N 40.264780E	1	Rostov region, Bagayevsky district	OQ067576	OP947739
13	BLm6Rv19	B. bassiana	1	reedbeds	L. migratoria	2019	47.249485N 40.264780E	1	Rostov region, Bagayevsky district	OQ067577	OP947740
14	BLm7Rv19	B. bassiana	1	reedbeds	L. migratoria	2019	47.249485N 40.264780E	1	Rostov region, Bagayevsky district	OQ067578	OP947741
15	BCi13Rv20	B. bassiana	2	steppe	C. italicus	2020	46.417576N 41.309966E	2	Rostov region, Salsky district, near Sryedniy Yegorlyk river	OQ067537	OP947700
16	BCi14Rv20	B. bassiana	3	steppe	C. italicus	2020	46.417576N 41.309966E	2	Rostov region, Salsky district, near Sryedniy Yegorlyk river	OQ067538	OP947701
17	BCi15Rv20	B. bassiana	2	steppe	C. italicus	2020	46.417576N 41.309966E	2	Rostov region, Salsky district, near Sryedniy Yegorlyk river	OQ067539	OP947702
18	BCi16Rv20	B. pseudobassiana	-	steppe	C. italicus	2020	46.417576N 41.309966E	2	Rostov region, Salsky district, near Sryedniy Yegorlyk river	OQ067540	OP947703
19	BDs8Rv21	B. bassiana	2	steppe	Dociostaurus sp.	2021	46.417576N 41.309966E	2	Rostov region, Salsky district, near Sryedniy Yegorlyk river	OQ067548	OP947711
20	BLm11KK20	B. bassiana	1	reedbeds	L. migratoria	2020	45.762667N 38.526972E	4	Krasnodar region, Primorsko-Akhtarsky district	OQ067550	OP947713
21	BLm12KK20	B. bassiana	2	reedbeds	L. migratoria	2020	45.762667N 38.526972E	4	Krasnodar region, Primorsko-Akhtarsky district	OQ067551	OP947714
22	BLm13KK20	B. bassiana	1	reedbeds	L. migratoria	2020	45.762667N 38.526972E	4	Krasnodar region, Primorsko-Akhtarsky district	OQ067552	OP947715
23	BLm14KK20	B. bassiana	1	reedbeds	L. migratoria	2020	45.762667N 38.526972E	4	Krasnodar region, Primorsko-Akhtarsky district	OQ067553	OP947716
24	BLm15KK20	B. bassiana	1	reedbeds	L. migratoria	2020	45.762667N 38.526972E	4	Krasnodar region, Primorsko-Akhtarsky district	OQ067554	OP947717
25	BLm16KK20	B. bassiana	2	reedbeds	L. migratoria	2020	45.762667N 38.526972E	4	Krasnodar region, Primorsko-Akhtarsky district	OQ067555	OP947718
26	BLm17KK20	B. bassiana	--	reedbeds	L. migratoria	2020	45.762667N 38.526972E	4	Krasnodar region, Primorsko-Akhtarsky district	OQ067556	OP947719
27	BLm18KK20	B. bassiana	1	reedbeds	L. migratoria	2020	45.762667N 38.526972E	4	Krasnodar region, Primorsko-Akhtarsky district	OQ067557	OP947720
28	BLm19KK20	B. bassiana	1	reedbeds	L. migratoria	2020	45.762667N 38.526972E	4	Krasnodar region, Primorsko-Akhtarsky district	OQ067558	OP947721
29	BLm20KK20	B. bassiana	1	reedbeds	L. migratoria	2020	45.762667N 38.526972E	4	Krasnodar region, Primorsko-Akhtarsky district	OQ067560	OP947723
30	BLm21KK20	B. bassiana	1	reedbeds	L. migratoria	2020	45.762667N 38.526972E	4	Krasnodar region, Primorsko-Akhtarsky district	OQ067561	OP947724
31	BLm22KK20	B. bassiana	1	reedbeds	L. migratoria	2020	45.762667N 38.526972E	4	Krasnodar region, Primorsko-Akhtarsky district	OQ067562	OP947725
32	BLm23KK20	B. bassiana	1	reedbeds	L. migratoria	2020	45.762667N 38.526972E	4	Krasnodar region, Primorsko-Akhtarsky district	OQ067563	OP947726
33	BLm24KK20	B. bassiana	1	reedbeds	L. migratoria	2020	45.762667N 38.526972E	4	Krasnodar region, Primorsko-Akhtarsky district	OQ067564	OP947727
34	BLm25KK20	B. bassiana	1	reedbeds	L. migratoria	2020	45.762667N 38.526972E	4	Krasnodar region, Primorsko-Akhtarsky district	OQ067565	OP947728
35	BLm26KK20	B. bassiana	1	reedbeds	L. migratoria	2020	45.762667N 38.526972E	4	Krasnodar region, Primorsko-Akhtarsky district	OQ067566	OP947729
36	BLm27KK20	B. bassiana	--	reedbeds	L. migratoria	2020	45.762667N 38.526972E	4	Krasnodar region, Primorsko-Akhtarsky district	OQ067567	OP947730
37	BLm28KK20	B. bassiana	1	reedbeds	L. migratoria	2020	45.762667N 38.526972E	4	Krasnodar region, Primorsko-Akhtarsky district	OQ067568	OP947731
38	BLm4KK21	B. bassiana	2	reedbeds	L. migratoria	2021	45.7331991N 38.3970525E	6	Krasnodar region, Primorsko-Akhtarsky district	OQ067573	OP947736
39	BLm5KK21	B. bassiana	2	reedbeds	L. migratoria	2021	45.7331991N 38.3970525E	6	Krasnodar region, Primorsko-Akhtarsky district	OQ067575	OP947738
40	BDs9Km21	B. bassiana	2	steppe	Dociostaurus sp.	2021	45.868507N 45.825854E	9	Republic of Kalmykia, Chernozemelsky district	OQ067549	OP947712
41	BAc1D21	B. bassiana	2	steppe	Acrididae	2021	42.994773N 47.257051E	15	Republic of Dagestan, Kumtorkalinsky district	OQ067534	OP947697
42	BCi11As20	B. bassiana	2	steppe	C. italicus	2020	48.58854N 45.704412E	18	Astrakhan region, Akhtubinsky District	OQ067535	OP947698
43	BCi12As20	B. bassiana	2	steppe	C. italicus	2020	48.58854N 45.704412E	18	Astrakhan region, Akhtubinsky District	OQ067536	OP947699
44	BLm31Vg20	B. bassiana	1	reedbeds	L. migratoria	2020	48.407908N 44.595948E	19	Volgograd region, Svetloyarsky district, near Sarpinskoe lake	OQ067570	OP947733
45	BLm32Vg20	B. bassiana	1	reedbeds	L. migratoria	2020	48.407908N 44.595948E	19	Volgograd region, Svetloyarsky district, near Sarpinskoe lake	OQ067571	OP947734
*Clades were designated according Figure 2 of the original article
** Number of locations designated according Figure 1 and Table S1
