# Supplementary material
Source: MDPI journal article supplement (https://www.mdpi.com/1424-2818/15/8/930)
Supplement: s1 [file s1 › Table S4.xlsx]

## Sheet: Лист1
Table S4. Reference sequences
Isolate	Species	Accession number
		TEF	Bloc
BIn622Ng18	B.bassiana	MN706321	MN706381
BD62Ps13	B.bassiana	MN706320	MN706380
BSc76Ng18	B.bassiana	MN706316	MN706376
BSc38KR17	B.pseudobassiana	MN706287	MN706347
BCo47KR17	B.pseudobassiana	MN706283	MN706343
BSc353Ak19	B.bassiana	MW988557	MW962166
YHH 1806011	B.pseudobassiana	MN523562	MN868298
ARSEF 1564	B.bassiana	HQ880974	HQ880692
RCEF5458	B.bassiana	JQ867167	JQ867117
KVL_03_76	B.bassiana	EF193188	EF193173
ARSEF 2462	B.bassiana	AY883697	AY883803
ARSEF 2040	B.bassiana	AY531910	AY883802
ARSEF 1811	B.bassiana	AY531901	AY883799
ARSEF 3405	B.bassiana	AY531931	HQ880723
ARSEF 4393	B.bassiana	AY883698	AY883806
